# Supplementary material
Source: publisher figshare collection journal article supplement (https://plos.figshare.com/articles/dataset/_/1286616)

**Figure S1. Sequence logos for PH domain.** Position-specific logos for the secondary structure elements of PH domain (generated by Weblogo server).  $\beta_4$  and  $\beta_5$  are not included because of the high variation within these two  $\beta$ -sheets. The size of residue indicates the relative frequency of the residue at the corresponding position.

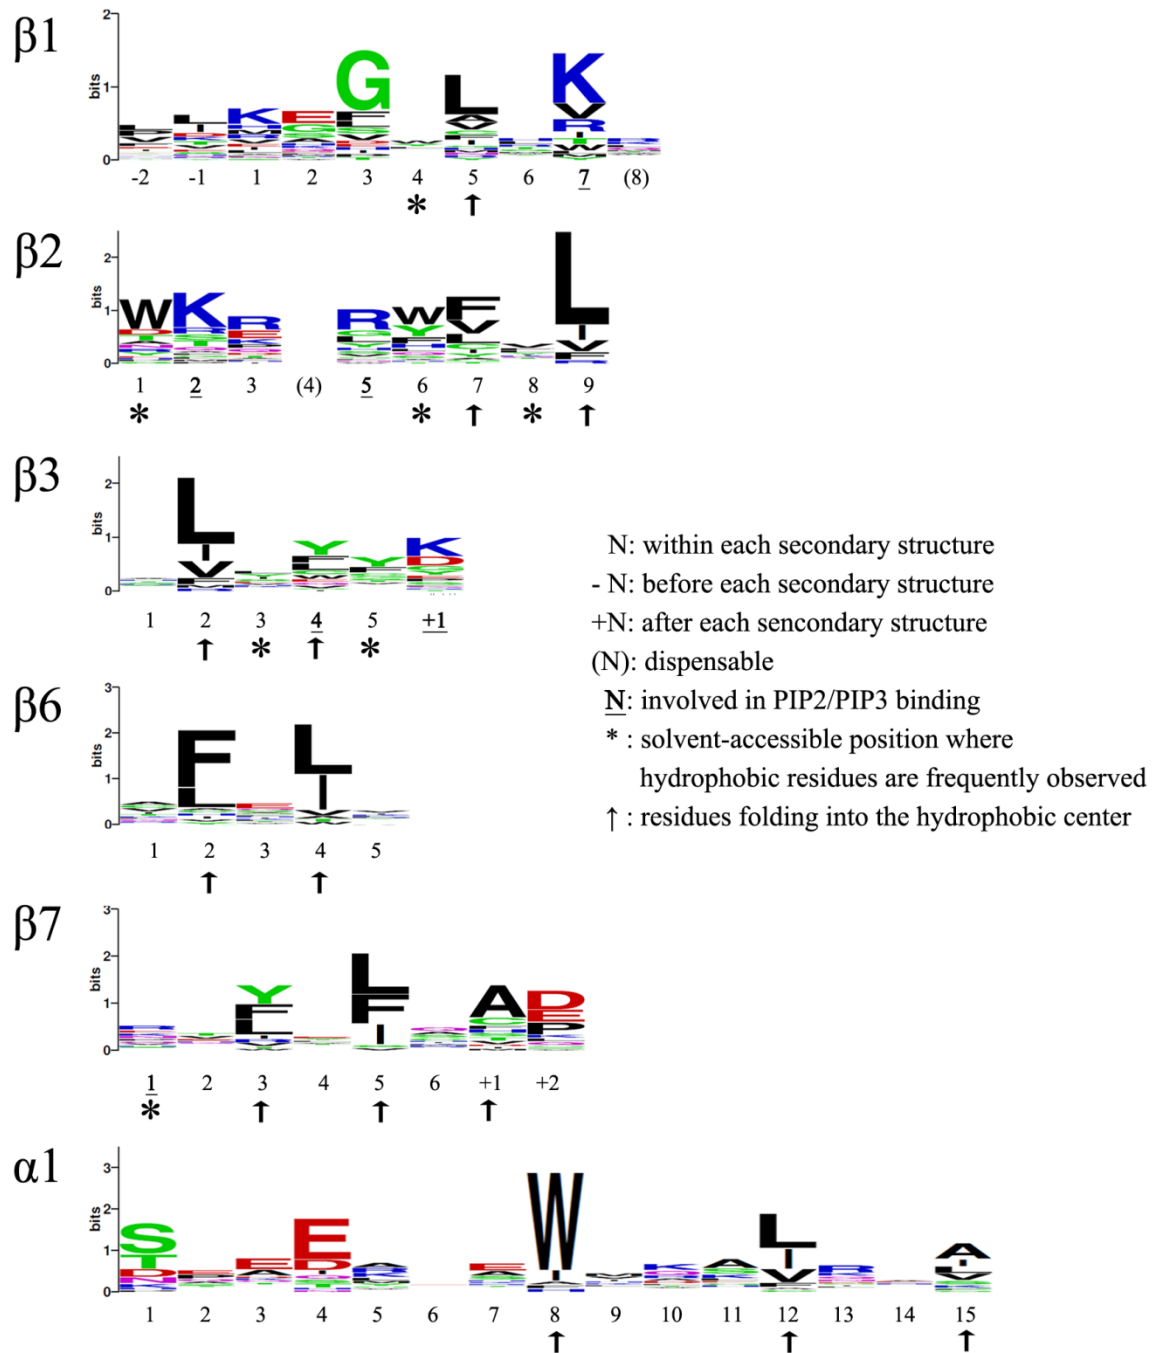

Supplement: Supplementary file 1 [file 1 › S1_Fig.pdf]
