# Supplementary material
Source: publisher figshare collection journal article supplement (https://plos.figshare.com/articles/dataset/_/1286616)
Supplement: Supplementary file 1 [file 1 › S1_Table.pdf]

**Table S1. Docking scores for 20 hits.** The hits which are consistently active in three assays are labeled with bold IDs.

| Compound ID    | Structure                                                                            | ChemPLP |
|----------------|--------------------------------------------------------------------------------------|---------|
| <b>GAB-001</b> | 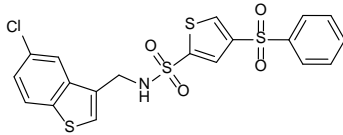   | 83.87   |
| GAB-002        | 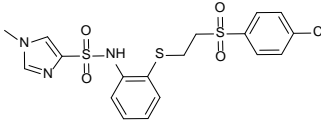    | 78.18   |
| GAB-003        | 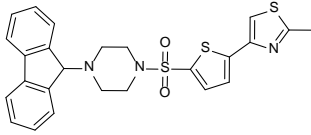    | 81.7    |
| <b>GAB-004</b> | 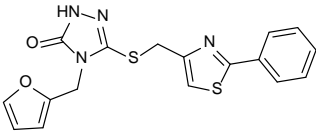  | 75.44   |
| GAB-005        | 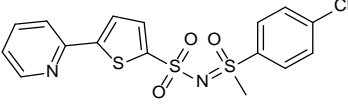 | 80.45   |
| GAB-006        | 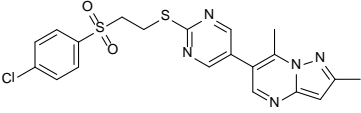 | 82.91   |
| <b>GAB-007</b> | 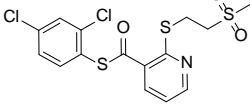  | 78.68   |
| GAB-008        | 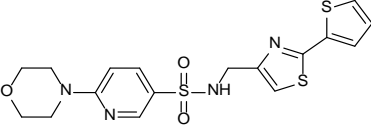 | 75.72   |
| GAB-009        | 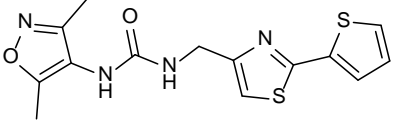 | 73.3    |

|                |                                                                                      |        |
|----------------|--------------------------------------------------------------------------------------|--------|
| GAB-010        | 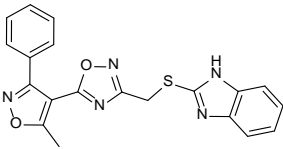    | 79.14  |
| GAB-011        | 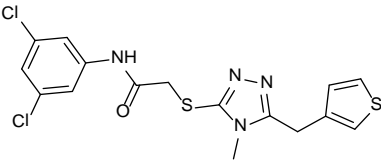   | 75.34  |
| GAB-012        | 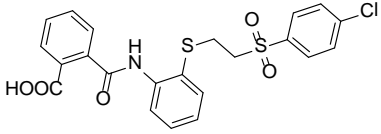   | 82.3   |
| GAB-013        | 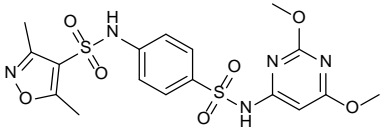   | 62.42  |
| GAB-014        | 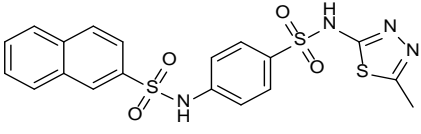   | 80.07  |
| GAB-015        | 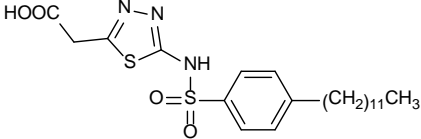  | 82.98  |
| <b>GAB-016</b> | 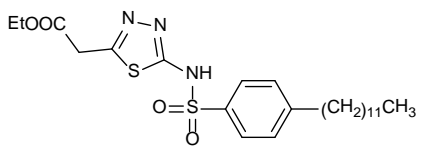 | 89.07  |
| <b>GAB-017</b> | 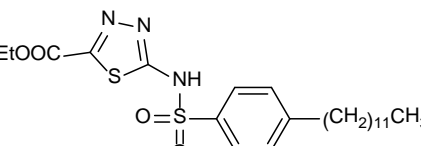 | 88.24  |
| GAB-018        | 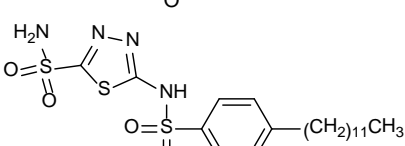 | 85.26  |
| GAB-019        | 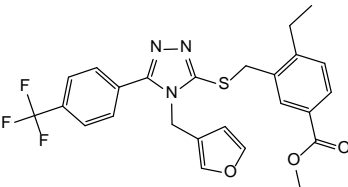 | 103.92 |

|         |                                                                                    |       |
|---------|------------------------------------------------------------------------------------|-------|
| GAB-020 | 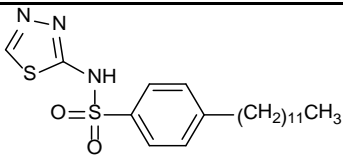 | 83.18 |
| DPIEL   | 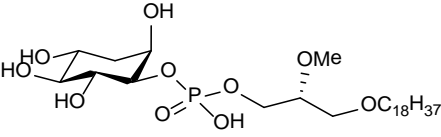 | NA    |
| IP4     | 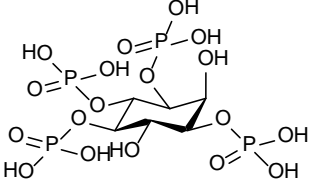  | NA    |
