# Supplementary material
Source: publisher figshare collection journal article supplement (https://plos.figshare.com/articles/dataset/_/1286616)
Supplement: Supplementary file 1 [file 1 › S2_Fig.pdf]

**Figure S2. Backbone RMSD and per-residue backbone RMSF for GAB1-IP4 complex.** The simulation lasted for 20ns. The mass-weighted average RMSFs were calculated for each residue based on backbone atoms. Atomic RMSFs of four phosphates in IP4 were shown in the last table.

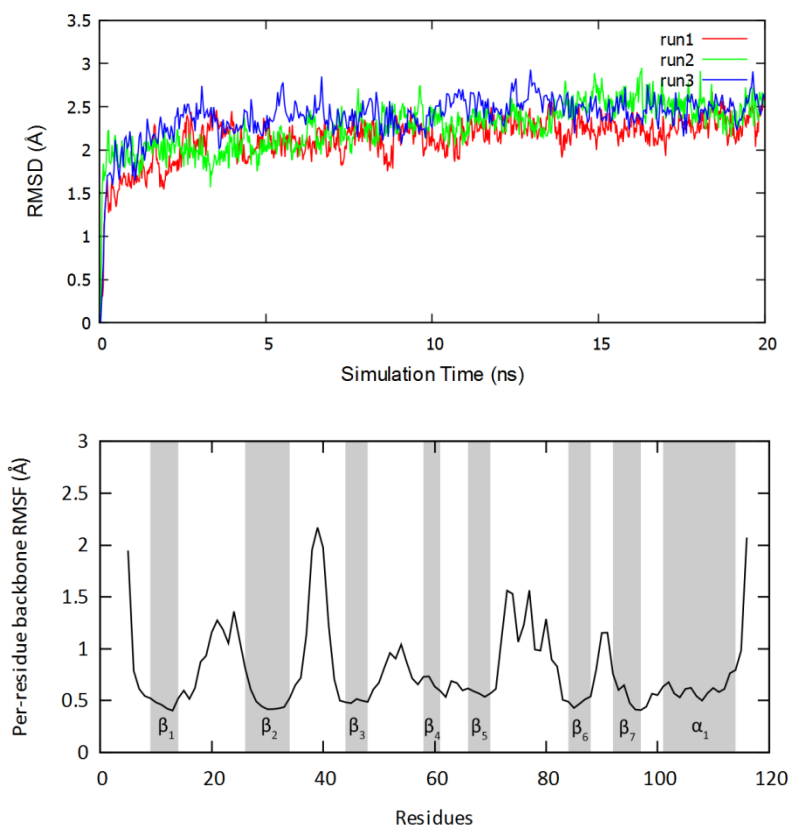

| Structure                                                                           | Position | RMSF (Å) |
|-------------------------------------------------------------------------------------|----------|----------|
| 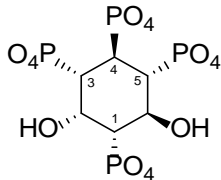 | 1-P      | 0.79     |
|                                                                                     | 3-P      | 0.62     |
|                                                                                     | 4-P      | 0.83     |
|                                                                                     | 5-P      | 1.02     |
