# Supplementary material
Source: publisher figshare collection journal article supplement (https://plos.figshare.com/articles/dataset/_/1286616)
Supplement: Supplementary file 1 [file 1 › S2_Table.pdf]

**Table S2. The crystal structures employed to generate PSSM.**

| PDB ID | Protein name  |
|--------|---------------|
| 3UZT   | GRK2          |
| 1EAZ   | TAPP1         |
| 1FAO   | DAPP1         |
| 1W1D   | PDPK1         |
| 1U27   | ARNO          |
| 1FHW   | GRP1          |
| 1UPR   | Pepp1         |
| 3AJ4   | Evectin-2     |
| 4FJH   | Kindlin-2     |
| 2DYN   | Dynamin-1     |
| 2DTC   | RalGPS1       |
| 3PP2   | ArhGAP27      |
| 2P0H   | ArhGAP9       |
| 3NSU   | SLM1          |
| 3CXB   | SKIP          |
| 3HK0   | Grb10         |
| 1QQG   | IRS1          |
| 1UNQ   | AKT1          |
| 1XD4   | SOS homolog 1 |
| 1LB1   | Dbp           |
| 3KZ1   | PRG           |
| 1KI1   | Intersectin   |
| 1FOE   | Tiam1         |
| 2W2X   | PLCG2         |
| 2VSZ   | ELMO1         |
| 1MAI   | PLCD1         |
| 3TW1   | Rtt1066       |
| 2R2Y   | Rpn13         |
| 3VOQ   | Sin1          |
| 3U12   | USP37         |
| 3PEG   | Neurofibromin |
| 4EMO   | SHARPIN       |
| 4DIX   | SCAB1         |
| 3RCP   | Fapp1         |
