# Supplementary material
Source: publisher figshare collection journal article supplement (https://plos.figshare.com/articles/dataset/_/1286616)

**Figure S3. Quality of GAB1 PH domain model.** This model was subjected to energy minimization prior to quality assessment. (A) QMEAN; (B) ProSA; (C); Ramachandran plot and summary generated by PROCHECK.

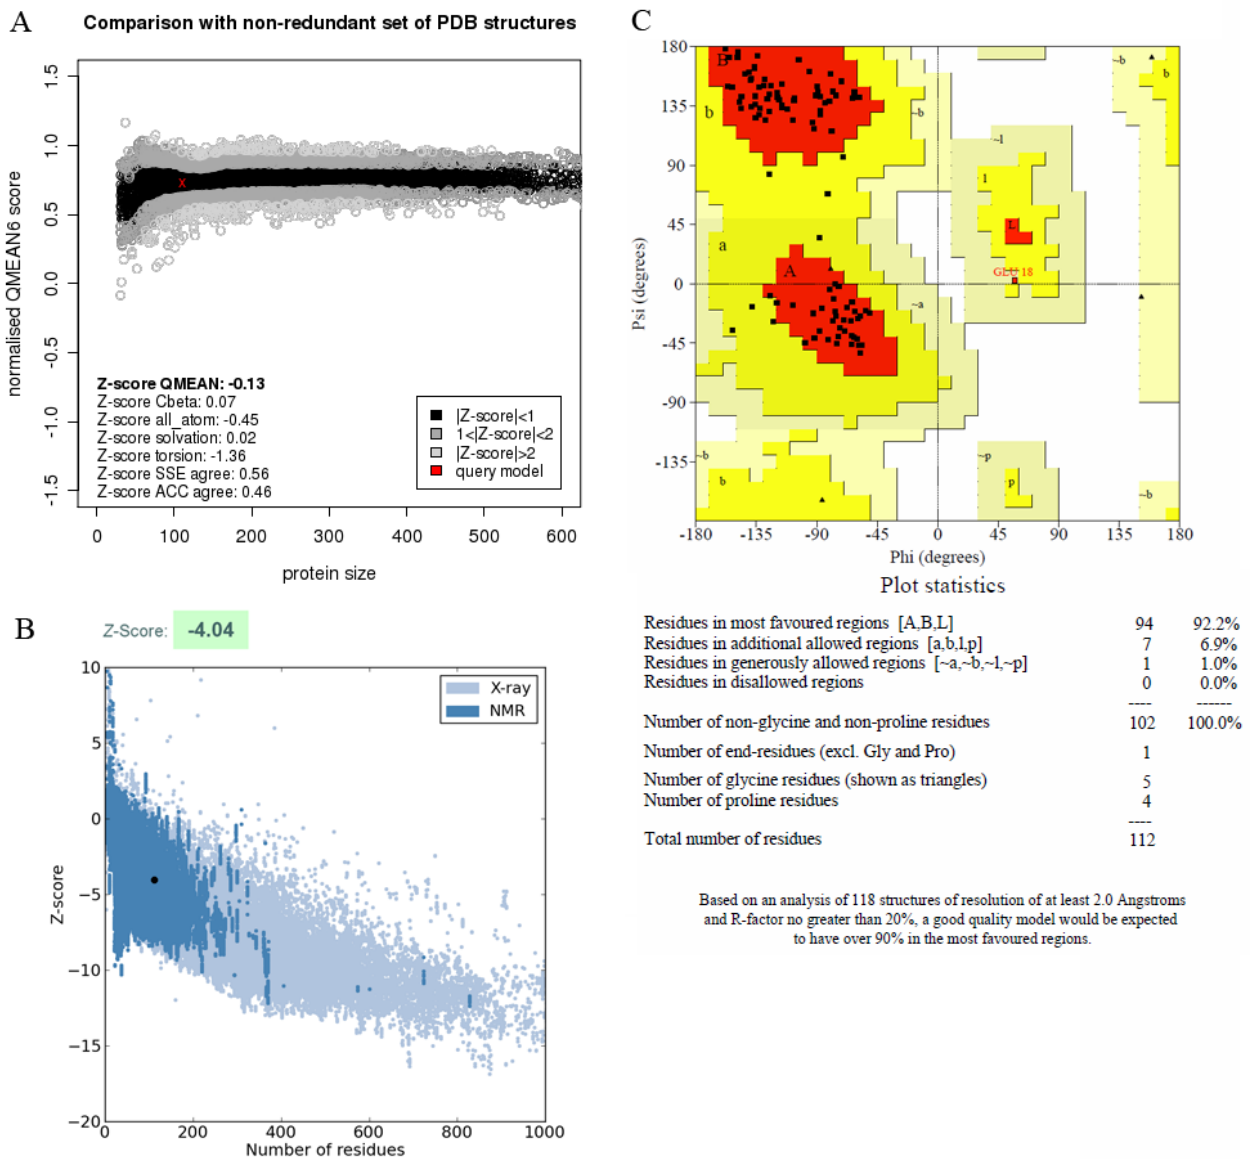

Supplement: Supplementary file 1 [file 1 › S3_Fig.pdf]
