# Supplementary material
Source: publisher figshare collection journal article supplement (https://plos.figshare.com/articles/dataset/_/1286616)
Supplement: Supplementary file 1 [file 1 › S3_Table.pdf]

**Table S3. PSSM profile for PH domain ( $\beta 1$ ,  $\beta 2$ ,  $\beta 3$ ,  $\beta 6$ ,  $\beta 7$  and  $\alpha 1$ ).**

| $\beta 1$ |    |    |    |    |    |    |    |    |    |    |    |    |    |    |    |    |    |    |    |    |
|-----------|----|----|----|----|----|----|----|----|----|----|----|----|----|----|----|----|----|----|----|----|
|           | A  | R  | N  | D  | C  | Q  | E  | G  | H  | I  | L  | K  | M  | F  | P  | S  | T  | W  | Y  | V  |
| <b>-2</b> | -2 | -2 | -2 | 0  | 1  | -2 | 0  | -1 | 2  | 0  | 0  | 0  | 1  | 1  | 3  | -2 | -2 | -3 | 1  | 1  |
| <b>-1</b> | -1 | 1  | -1 | 1  | -3 | 1  | 1  | -3 | 2  | 0  | 0  | 1  | -1 | -2 | -2 | 0  | 1  | -2 | 2  | 0  |
| <b>1</b>  | -1 | 0  | -2 | -2 | -3 | 1  | 1  | -3 | 3  | 0  | 0  | 3  | 2  | 0  | -3 | -1 | -2 | -3 | -2 | 1  |
| <b>2</b>  | 1  | -1 | -1 | 0  | -3 | 1  | 2  | 3  | 2  | -3 | -3 | 1  | 0  | 0  | -3 | 1  | 0  | -4 | -2 | -2 |
| <b>3</b>  | -2 | -3 | -2 | 0  | -4 | -3 | -1 | 4  | 1  | 0  | -1 | -3 | -2 | 2  | 0  | 0  | -1 | -3 | -2 | 0  |
| <b>4</b>  | -2 | -1 | 1  | -3 | 1  | 0  | -2 | -4 | 3  | -2 | 1  | 0  | 1  | 1  | 0  | -1 | -1 | 4  | 3  | 0  |
| <b>5</b>  | 0  | -1 | -1 | -4 | 2  | -3 | -3 | -1 | 1  | 2  | 2  | -3 | 1  | 1  | -4 | -2 | -2 | -3 | 1  | 1  |
| <b>6</b>  | -1 | 2  | -2 | -1 | -3 | -1 | -1 | -1 | 4  | -2 | 0  | 0  | 2  | -2 | 1  | 1  | 0  | 4  | 0  | 0  |
| <b>7</b>  | -3 | 2  | -3 | -4 | -4 | -2 | -2 | -4 | -3 | 1  | 0  | 4  | 1  | -3 | -4 | -3 | 1  | 4  | 0  | 2  |
| <b>8</b>  | -1 | 3  | -1 | 0  | -3 | 1  | -1 | -1 | -2 | 0  | 0  | 2  | 2  | 0  | -1 | -2 | 0  | 3  | -2 | 0  |

| $\beta 2$ |    |    |    |    |    |    |    |    |    |    |    |    |    |    |    |    |    |    |    |    |
|-----------|----|----|----|----|----|----|----|----|----|----|----|----|----|----|----|----|----|----|----|----|
|           | A  | R  | N  | D  | C  | Q  | E  | G  | H  | I  | L  | K  | M  | F  | P  | S  | T  | W  | Y  | V  |
| <b>1</b>  | -1 | 1  | 1  | 2  | -4 | -2 | 0  | -3 | 2  | -4 | -4 | -2 | -3 | -2 | 0  | -1 | 1  | 9  | 2  | -4 |
| <b>2</b>  | 0  | 1  | -2 | -2 | -4 | 0  | -1 | -1 | -2 | -3 | -2 | 5  | 0  | 0  | 1  | 1  | 1  | -4 | -3 | -3 |
| <b>3</b>  | -1 | 3  | -1 | 1  | -4 | 2  | 3  | -3 | 1  | -1 | -3 | 2  | -2 | -1 | 1  | -1 | -1 | -4 | -2 | -3 |
| <b>5</b>  | -2 | 3  | -1 | -3 | 0  | -2 | -2 | 1  | 3  | -2 | 1  | -1 | -1 | 1  | -3 | 0  | -2 | 3  | 2  | 0  |
| <b>6</b>  | -1 | 0  | -3 | -4 | -4 | 1  | -3 | -4 | 4  | -3 | 0  | -3 | -2 | 3  | -4 | 0  | -1 | 8  | 4  | -3 |
| <b>7</b>  | -1 | -4 | -4 | -4 | 4  | -3 | -4 | -2 | -3 | 1  | 2  | -4 | 0  | 4  | -4 | -3 | -1 | -2 | 1  | 2  |
| <b>8</b>  | -1 | 0  | -2 | -1 | 0  | 0  | -1 | -1 | 1  | 0  | 1  | 0  | -1 | 3  | -3 | -2 | 0  | -2 | 2  | 1  |
| <b>9</b>  | -3 | 0  | -5 | -5 | -3 | -4 | -4 | -5 | -4 | 3  | 4  | -3 | 0  | 2  | -4 | -4 | -2 | -3 | -2 | 2  |

| $\beta 3$ |    |    |    |    |    |    |    |    |    |    |    |    |    |   |    |    |    |    |    |    |
|-----------|----|----|----|----|----|----|----|----|----|----|----|----|----|---|----|----|----|----|----|----|
|           | A  | R  | N  | D  | C  | Q  | E  | G  | H  | I  | L  | K  | M  | F | P  | S  | T  | W  | Y  | V  |
| <b>1</b>  | 1  | 1  | -1 | -3 | 2  | -1 | -1 | -1 | 3  | 0  | 0  | 0  | -2 | 0 | -3 | 1  | 1  | -3 | -2 | 0  |
| <b>2</b>  | -3 | -1 | -5 | -6 | -3 | -4 | -5 | -6 | -5 | 3  | 4  | -4 | 2  | 2 | -5 | -4 | -3 | -4 | -2 | 3  |
| <b>3</b>  | -2 | -2 | -3 | -3 | 2  | 0  | 1  | -2 | 2  | 2  | 1  | -1 | -1 | 0 | -3 | 0  | -1 | 3  | 3  | 1  |
| <b>4</b>  | -3 | -4 | -4 | -4 | 5  | 1  | 0  | -2 | -3 | 0  | 1  | -4 | -2 | 3 | -5 | -3 | -3 | 6  | 5  | 0  |
| <b>5</b>  | -2 | -1 | -3 | 0  | 4  | -1 | -1 | -1 | 1  | -3 | -2 | 0  | -2 | 3 | -4 | 0  | 0  | -2 | 5  | -1 |
| <b>+1</b> | -2 | 0  | -2 | 2  | -5 | 0  | 0  | 0  | -2 | -4 | -4 | 4  | -3 | 0 | 1  | 1  | 0  | -3 | 3  | -4 |

| $\beta 6$ |    |    |    |    |    |    |    |    |    |   |   |    |    |    |    |    |    |    |    |   |
|-----------|----|----|----|----|----|----|----|----|----|---|---|----|----|----|----|----|----|----|----|---|
|           | A  | R  | N  | D  | C  | Q  | E  | G  | H  | I | L | K  | M  | F  | P  | S  | T  | W  | Y  | V |
| <b>1</b>  | 0  | 1  | 1  | -2 | 3  | 1  | -2 | 0  | -2 | 1 | 0 | 1  | 2  | -2 | -3 | -1 | 1  | -3 | -2 | 0 |
| <b>2</b>  | -2 | -4 | -5 | -5 | 1  | -4 | -5 | -5 | 1  | 0 | 3 | -5 | -1 | 7  | -5 | -4 | -3 | -2 | 2  | 0 |
| <b>3</b>  | 0  | -2 | -2 | -2 | 2  | 1  | 2  | -3 | 2  | 0 | 0 | 0  | -1 | 1  | -3 | 0  | 1  | -2 | 2  | 0 |
| <b>4</b>  | 0  | -4 | -5 | -5 | -3 | -4 | -4 | -5 | -5 | 4 | 4 | -4 | 0  | -2 | -4 | -3 | 0  | 5  | -2 | 1 |
| <b>5</b>  | -2 | 1  | 0  | -2 | -3 | 2  | 1  | -3 | 3  | 1 | 0 | 1  | -1 | 0  | -3 | -1 | 0  | 2  | 1  | 1 |

$\beta 7$ 

|           | A  | R  | N  | D  | C  | Q  | E  | G  | H  | I  | L  | K  | M  | F  | P  | S  | T  | W  | Y  | V  |
|-----------|----|----|----|----|----|----|----|----|----|----|----|----|----|----|----|----|----|----|----|----|
| <b>1</b>  | -2 | 2  | 2  | -2 | 2  | 1  | 2  | -3 | 3  | -1 | -3 | 2  | 0  | -4 | 3  | 0  | -2 | -5 | -3 | 0  |
| <b>2</b>  | -2 | 0  | 1  | -2 | 1  | 1  | 2  | 0  | 2  | -1 | -1 | -1 | -2 | 0  | 1  | 0  | 1  | -4 | -2 | 1  |
| <b>3</b>  | -4 | 1  | -5 | -5 | -4 | -4 | -4 | -5 | -3 | 1  | 2  | -4 | -2 | 4  | -5 | -4 | 0  | 4  | 5  | 0  |
| <b>4</b>  | -1 | 0  | 0  | -1 | -3 | -1 | 1  | -3 | 0  | 0  | 1  | -1 | -1 | 0  | -3 | 0  | 1  | 3  | 2  | 1  |
| <b>5</b>  | -3 | -5 | -5 | -5 | -4 | -5 | -5 | -5 | -4 | 3  | 3  | -5 | -1 | 6  | -5 | -1 | -3 | -3 | -1 | 0  |
| <b>6</b>  | 0  | 0  | -2 | 0  | 4  | 2  | 0  | -3 | 3  | -1 | -2 | 0  | 2  | -3 | -3 | 1  | -1 | 4  | -2 | -1 |
| <b>+1</b> | 3  | -3 | -2 | 0  | 4  | -2 | -2 | -2 | 2  | 0  | -2 | -2 | 2  | 1  | -3 | 0  | 1  | -3 | -2 | 0  |
| <b>+2</b> | -2 | -2 | -1 | 4  | -4 | 2  | 2  | 0  | -2 | -3 | -1 | 0  | -2 | -4 | 3  | 0  | -2 | -4 | -3 | -1 |

 $\alpha 1$ 

|           | A  | R  | N  | D  | C  | Q  | E  | G  | H  | I  | L  | K  | M  | F  | P  | S  | T  | W  | Y  | V  |
|-----------|----|----|----|----|----|----|----|----|----|----|----|----|----|----|----|----|----|----|----|----|
| <b>1</b>  | -2 | -2 | 2  | 2  | -4 | -2 | -2 | -3 | 3  | -4 | -4 | 2  | -3 | -4 | 2  | 3  | 3  | -5 | -3 | -4 |
| <b>2</b>  | 0  | 1  | -1 | 0  | -2 | 1  | 0  | 0  | -1 | 0  | -1 | 0  | -1 | -2 | 1  | 0  | 0  | -2 | 1  | 0  |
| <b>3</b>  | 1  | -1 | 0  | 1  | -3 | 1  | 3  | -3 | 2  | -3 | -3 | 1  | -3 | 0  | 0  | 0  | 0  | -4 | -2 | -2 |
| <b>4</b>  | -3 | -2 | 1  | 3  | -5 | 2  | 5  | -4 | 3  | 1  | -4 | -2 | -3 | -5 | -3 | 1  | 0  | -5 | -4 | -3 |
| <b>5</b>  | 2  | 2  | -3 | -1 | 2  | 0  | -2 | -3 | -2 | 0  | 1  | 1  | 2  | -2 | -3 | -2 | -2 | -3 | 2  | 0  |
| <b>6</b>  | 0  | 0  | 1  | 1  | 1  | 1  | 1  | -2 | 2  | 0  | -1 | 0  | 1  | -1 | -2 | 0  | 0  | -3 | -2 | -1 |
| <b>7</b>  | 1  | 0  | 0  | 0  | -3 | 1  | 2  | -1 | 2  | -1 | -1 | 1  | -2 | -3 | -2 | 1  | 1  | -4 | -2 | -2 |
| <b>8</b>  | -1 | -6 | -6 | -7 | -5 | -5 | -6 | -6 | 2  | 1  | -4 | -6 | -4 | 1  | -6 | -5 | -5 | 11 | -1 | -4 |
| <b>9</b>  | -1 | 0  | -2 | -1 | 2  | -2 | -2 | -4 | 2  | 2  | 0  | 0  | 4  | 1  | -3 | -2 | 0  | -3 | 0  | 1  |
| <b>10</b> | 0  | 2  | 0  | 1  | -3 | 2  | 0  | -3 | -2 | -2 | 0  | 2  | 1  | 0  | -3 | -1 | 0  | -3 | -2 | 0  |
| <b>11</b> | 2  | -2 | 0  | -2 | -2 | -1 | 0  | 0  | 1  | -1 | 0  | 1  | -1 | 0  | -2 | 1  | 0  | -3 | 1  | -1 |
| <b>12</b> | 0  | -4 | -5 | -5 | 1  | -4 | -4 | -5 | -4 | 3  | 4  | -4 | 0  | 1  | -4 | -3 | -2 | -3 | -2 | 3  |
| <b>13</b> | -1 | 4  | 2  | 1  | 0  | 2  | 0  | -1 | 1  | -1 | -1 | 2  | -2 | -4 | -3 | -1 | -2 | -4 | -3 | -3 |
| <b>14</b> | 1  | 2  | -1 | 1  | -3 | 2  | 1  | 0  | 0  | -1 | -1 | 1  | -2 | -2 | -2 | 0  | 0  | 2  | 0  | -2 |
| <b>15</b> | 2  | -2 | -3 | -3 | 1  | -2 | -3 | -1 | -3 | 2  | 1  | 0  | -1 | 1  | -3 | 0  | -1 | -3 | -2 | 2  |
