# Supplementary material
Source: publisher figshare collection journal article supplement (https://plos.figshare.com/articles/dataset/_/1286616)

**Figure S5. Isovolume of GAB1 PH domain generated by GRID.** The area favoring H-bond acceptor (-6.0 kcal/mol) was displayed in magenta surface, whereas area favoring hydrophobic (-2.0 kcal/mol) probes was displayed in green surface. The protein backbone is illustrated with cyan lines, and the ligand (IP4) is in blue sticks. The crucial residues are labeled around isovolume surface.

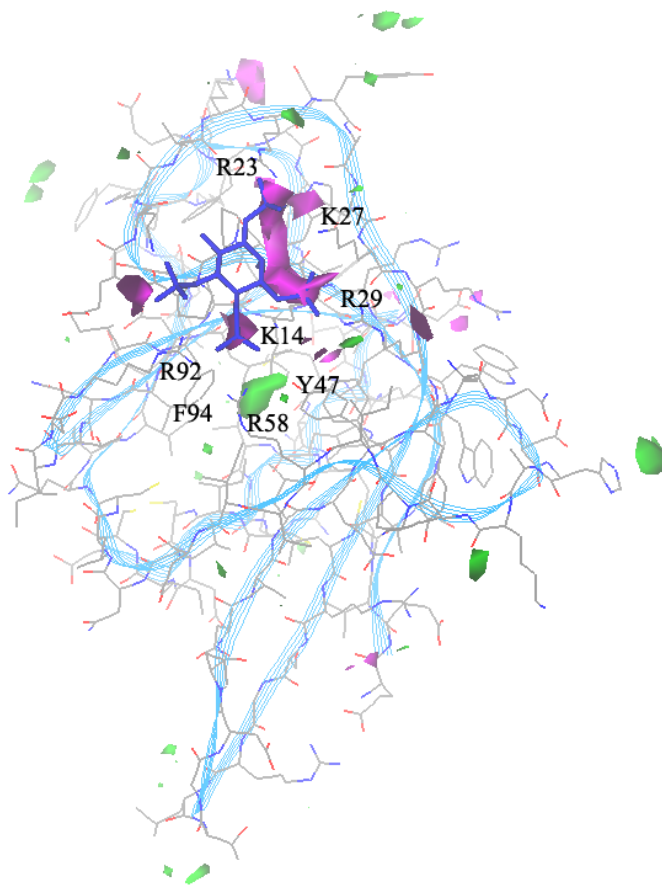

Supplement: Supplementary file 1 [file 1 › S5_Fig.pdf]
