# Supplementary material
Source: publisher figshare collection journal article supplement (https://plos.figshare.com/articles/dataset/_/1286616)
Supplement: Supplementary file 1 [file 1 › S7_Fig.pdf]

**Figure S7. Inhibition of S312 phosphorylation of IRS1.** The percentage of inhibition values are calculated from three separated experiments.

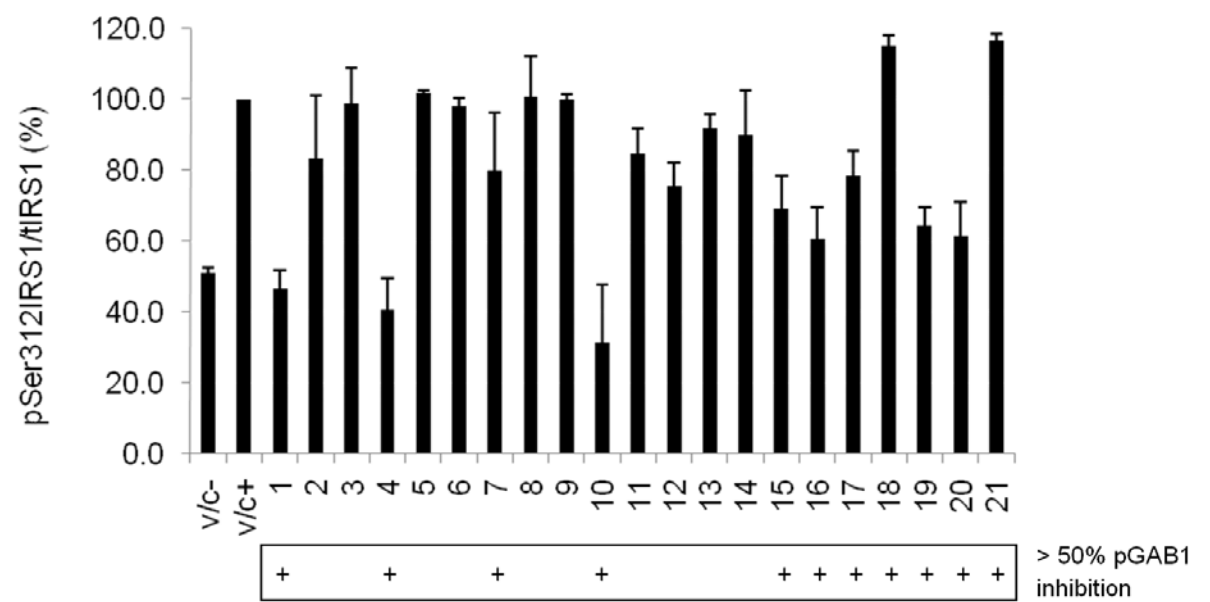

Raw data

|        | V/C- | V/C+  | 1    | 2     | 3     | 4    | 5     | 6     | 7     | 8     | 9     | 10    |
|--------|------|-------|------|-------|-------|------|-------|-------|-------|-------|-------|-------|
| Avg    | 50.8 | 100.0 | 46.5 | 83.2  | 98.7  | 40.7 | 101.8 | 98.2  | 79.7  | 100.7 | 100.0 | 31.1  |
| StdDev | 1.56 | 0.02  | 5.40 | 17.82 | 10.08 | 8.93 | 0.83  | 1.92  | 16.65 | 11.56 | 1.38  | 16.63 |
|        | 11   | 12    | 13   | 14    | 15    | 16   | 17    | 18    | 19    | 20    | 21    |       |
| Avg    | 84.8 | 75.6  | 91.7 | 89.9  | 69.0  | 60.6 | 78.4  | 115.3 | 64.4  | 61.3  | 116.5 |       |
| StdDev | 6.79 | 6.36  | 4.06 | 12.61 | 9.46  | 8.82 | 7.07  | 2.70  | 5.00  | 9.61  | 2.09  |       |
