# Supplementary material
Source: publisher figshare collection journal article supplement (https://plos.figshare.com/articles/dataset/_/1286616)

**Figure S9. Schematic representation of frame of reference used to define the position and orientation restraints.** To reduce the degrees of freedom, P1, P2, P3 and L1, L2, L3 were employed to represent the coordinates of the protein and the ligand, respectively, as described in **Method S1**.

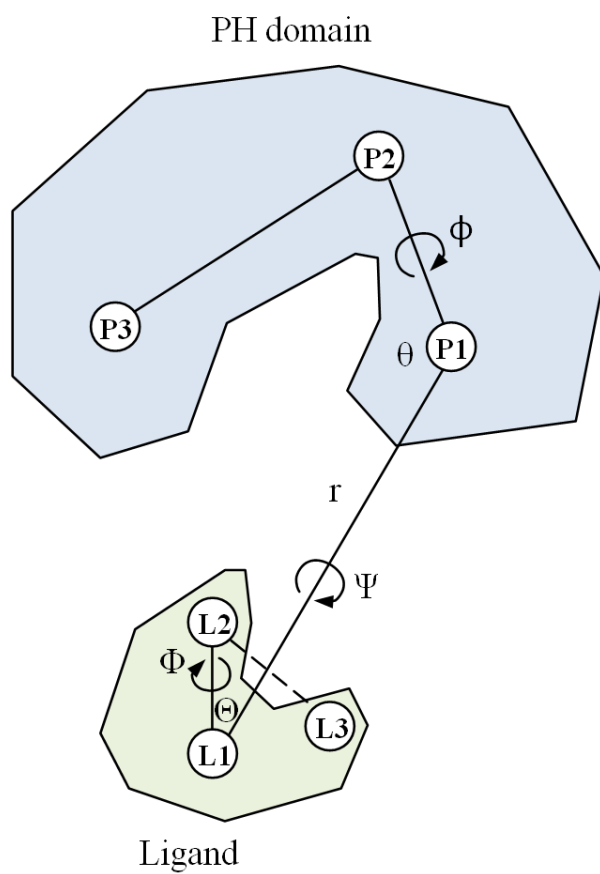

Supplement: Supplementary file 1 [file 1 › S9_Fig.pdf]
