# Supplementary material
Source: publisher figshare collection journal article supplement (https://plos.figshare.com/articles/dataset/_/1286616)

**Figure S10. Ligand conformational PMF as a function of mass-weighted RMSD ( $\xi$ ).** The ligand in the bulk is in black lines, whereas the ligand in the active site is in read lines. **(A-E)**. PMFs derived from GAB1-inhibitor complexes. **(F-H)**. PMFs derived from IRS1-inhibitor complexes.

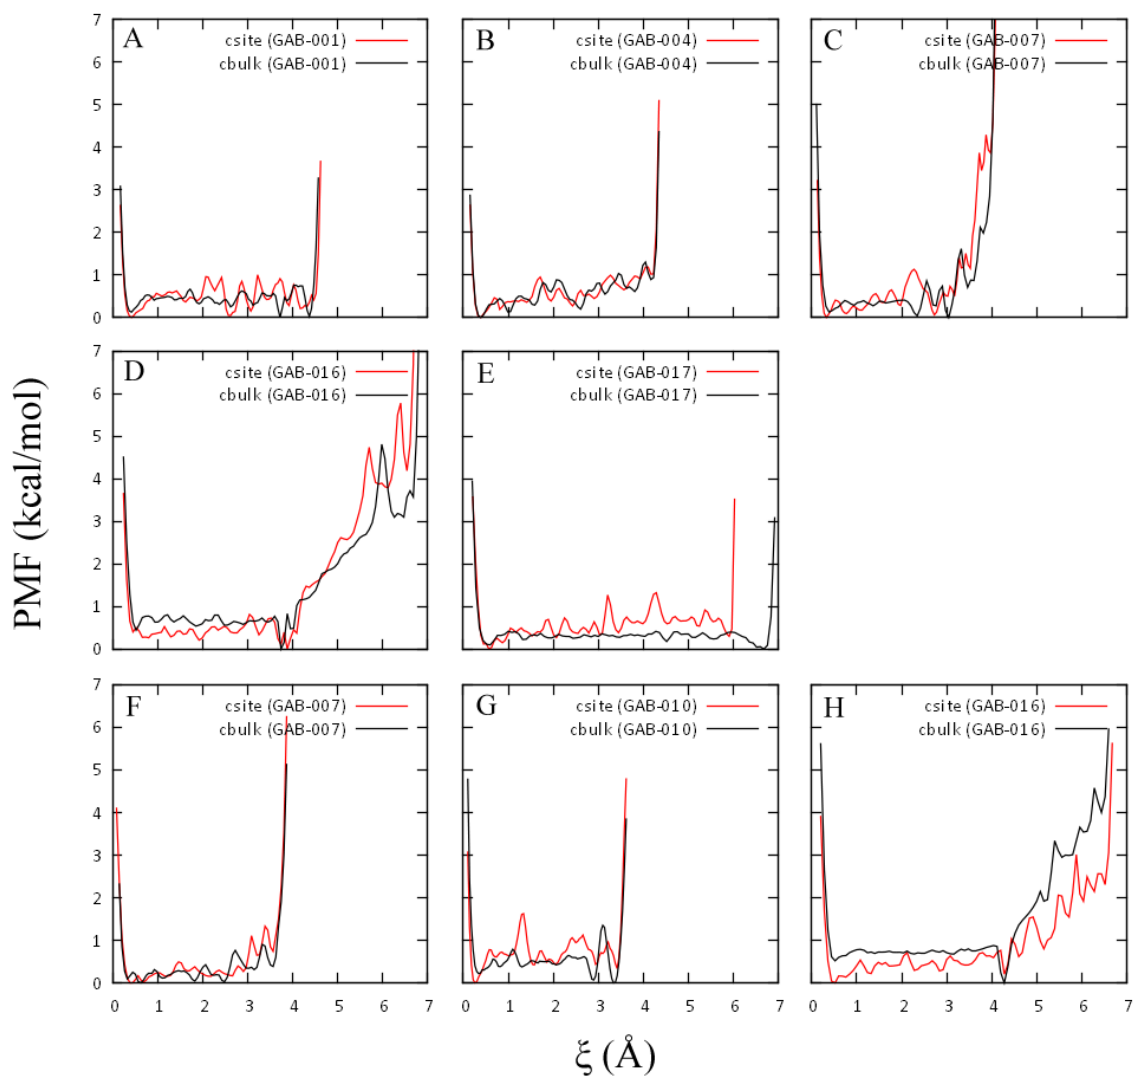

Supplement: Supplementary file 1 [file 1 › S10_Fig.pdf]
