# Supplementary material
Source: publisher figshare collection journal article supplement (https://plos.figshare.com/articles/dataset/_/1286616)

**Figure S11. Separation PMF as a function of L1-P1 distance ( $r$ ).** (A-E). PMFs derived from GAB1-inhibitor complexes. (F-H). PMFs derived from IRS1-inhibitor complexes.

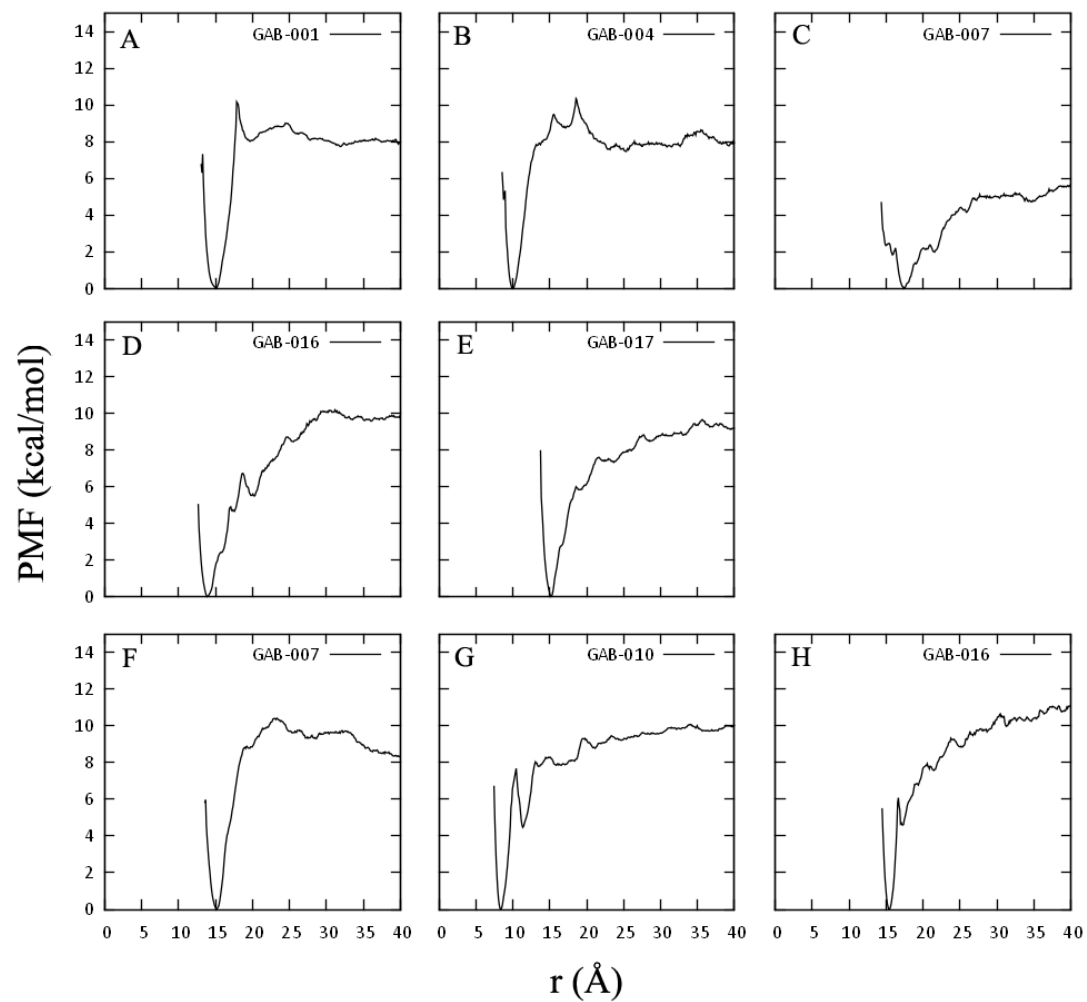

Supplement: Supplementary file 1 [file 1 › S11_Fig.pdf]
