# Supplementary material
Source: publisher figshare collection journal article supplement (https://plos.figshare.com/articles/dataset/_/1286616)

**Figure S12. Pharmacophore of the inhibitors.** Green: hydrophobic or aromatic region. Blue: the projection of H-bond acceptor.

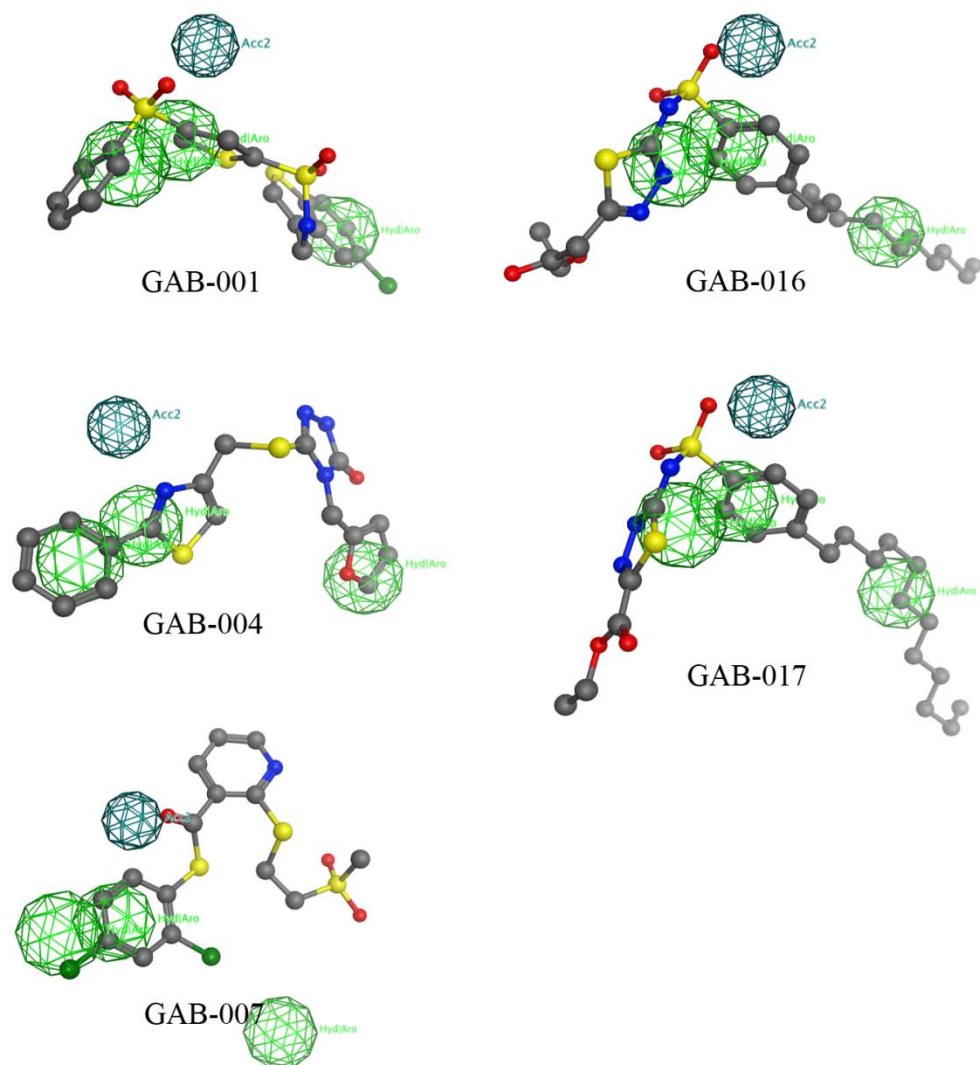

Supplement: Supplementary file 1 [file 1 › S12_Fig.pdf]
