# Supplementary material
Source: publisher figshare collection journal article supplement (https://plos.figshare.com/articles/dataset/_/1286616)

**Figure S6. SPR of GAB-001, GAB-016 binding to GAB1 PH domain.**

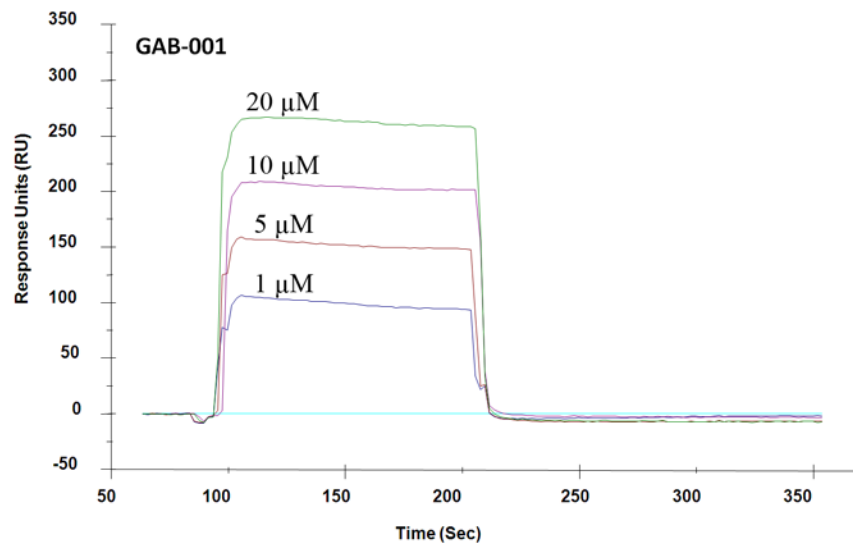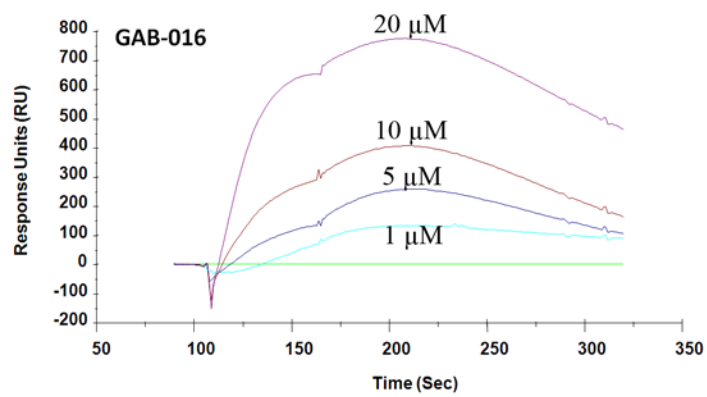

Supplement: Supplementary file 1 [file 1 › S6_Fig.pdf]

**Figure S8. Backbone RMSD of GAB1PH/IRS1PH – inhibitor complex.**

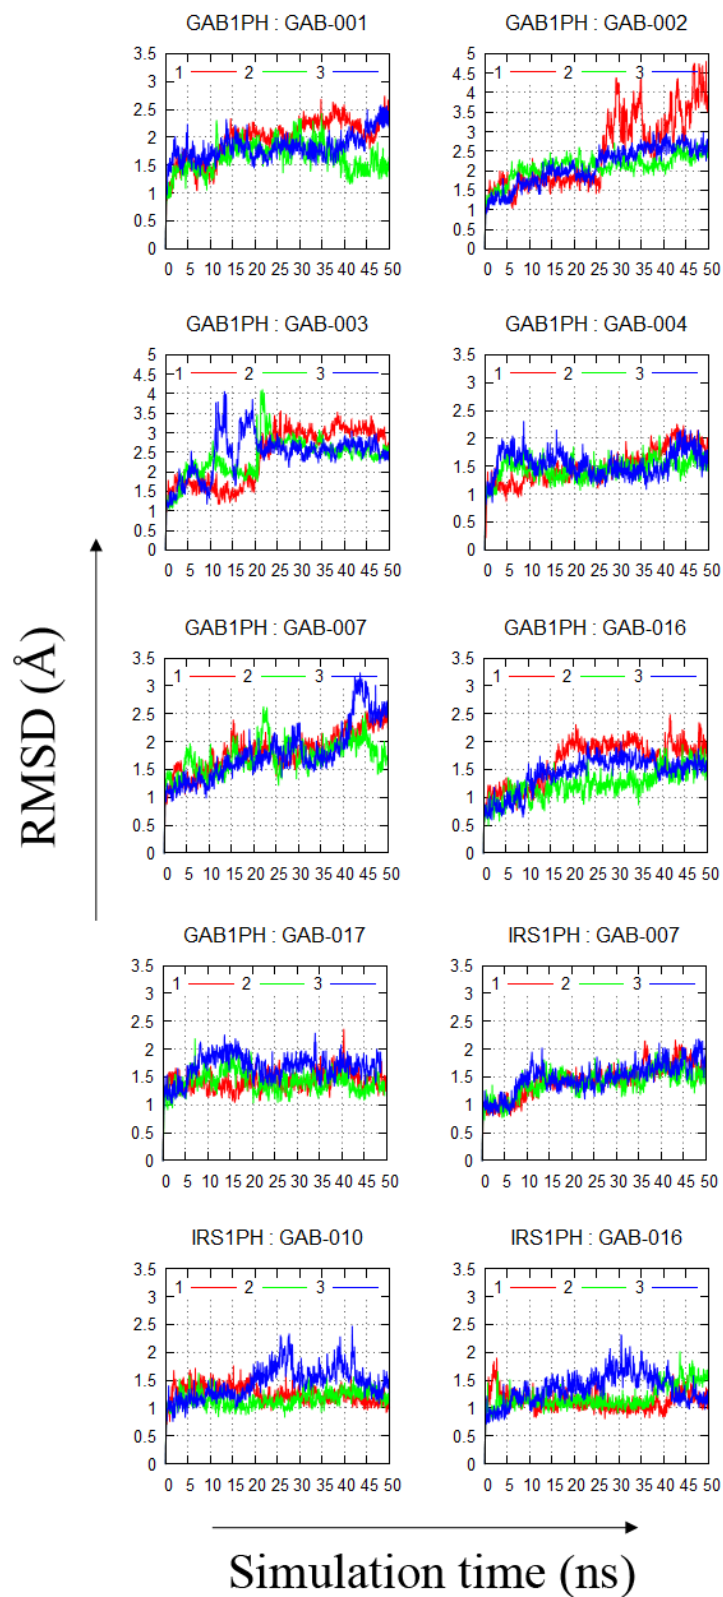

Supplement: Supplementary file 1 [file 1 › S8_Fig.pdf]
